# Supplementary material
Source: PubMed Central journal article supplement (PMC5826549)
Supplement: NIHMS941666-supplement-supplement_1.pdf [file NIHMS941666-supplement-supplement_1.pdf]

**SUPPORTING TABLE 1.** Breast Cancer: Number of Cases for Females (Ages 15-99 Years) Diagnosed 2001-2009 and Distribution by SEER Summary Stage 2000 at Diagnosis by Race, Calendar Period of Diagnosis, and US Census Region and States<sup>a</sup>

|                           | SEER Summary Stage 2000 | 2001-2003 |         |        | 2004-2009 |         |         |
|---------------------------|-------------------------|-----------|---------|--------|-----------|---------|---------|
|                           |                         | All Races | White   | Black  | All Races | White   | Black   |
| <b>UNITED STATES</b>      |                         |           |         |        |           |         |         |
|                           | No. of patients         | 446,106   | 385,888 | 42,401 | 926,271   | 782,220 | 100,611 |
|                           | Localized (%)           | 59.1      | 60.5    | 47.5   | 59.1      | 60.5    | 48.5    |
|                           | Regional (%)            | 29.8      | 29.1    | 35.3   | 30.2      | 29.6    | 35.2    |
|                           | Distant (%)             | 4.4       | 4.2     | 6.8    | 5.2       | 4.9     | 7.8     |
|                           | Unknown (%)             | 6.7       | 6.2     | 10.3   | 5.4       | 5.0     | 8.4     |
| <b>NORTHEAST</b>          |                         |           |         |        |           |         |         |
| <b>New England</b>        |                         |           |         |        |           |         |         |
| Connecticut<br>(SEER)     | No. of patients         | 7886      | 7252    | 501    | 15,600    | 14,177  | 1036    |
|                           | Localized (%)           | 62.8      | 63.4    | 57.3   | 64.6      | 65.6    | 53.9    |
|                           | Regional (%)            | 30.3      | 29.9    | 33.9   | 28.8      | 28.0    | 36.4    |
|                           | Distant (%)             | 4.3       | 4.3     | 5.0    | 4.9       | 4.7     | 6.9     |
|                           | Unknown (%)             | 2.5       | 2.4     | 3.8    | 1.7       | 1.6     | 2.8     |
| Massachusetts<br>(NPCR)   | No. of patients         | 14,464    | 13,633  | 494    | 29,427    | 27,403  | 1255    |
|                           | Localized (%)           | 65.6      | 66.0    | 55.3   | 66.8      | 67.3    | 58.6    |
|                           | Regional (%)            | 27.5      | 27.1    | 37.0   | 27.2      | 26.8    | 34.4    |
|                           | Distant (%)             | 4.4       | 4.4     | 5.3    | 4.5       | 4.5     | 5.2     |
|                           | Unknown (%)             | 2.5       | 2.5     | 2.4    | 1.4       | 1.4     | 1.8     |
| New Hampshire<br>(NPCR)   | No. of patients         | 2735      | 2679    | 11     | 5727      | 5626    | 25      |
|                           | Localized (%)           | 63.6      | 63.6    | 45.5   | 66.4      | 66.5    | 48.0    |
|                           | Regional (%)            | 29.1      | 29.2    | 45.5   | 27.6      | 27.6    | 40.0    |
|                           | Distant (%)             | 3.9       | 3.8     | 9.1    | 4.3       | 4.3     | 8.0     |
|                           | Unknown (%)             | 3.4       | 3.3     | 0.0    | 1.8       | 1.6     | 4.0     |
| Rhode Island<br>(NPCR)    | No. of patients         | 2317      | 2222    | 65     | 4817      | 4568    | 171     |
|                           | Localized (%)           | 64.6      | 65.0    | 52.3   | -         | -       | -       |
|                           | Regional (%)            | 27.6      | 27.3    | 43.1   | -         | -       | -       |
|                           | Distant (%)             | 3.7       | 3.6     | 3.1    | -         | -       | -       |
|                           | Unknown (%)             | 4.2       | 4.1     | 1.5    | -         | -       | -       |
| <b>Mid Atlantic</b>       |                         |           |         |        |           |         |         |
| New Jersey<br>(NPCR/SEER) | No. of patients         | 18,005    | 15,440  | 1867   | 36,462    | 30,633  | 4052    |
|                           | Localized (%)           | 56.4      | 57.7    | 47.7   | 59.8      | 61.2    | 50.7    |
|                           | Regional (%)            | 34.1      | 33.4    | 38.6   | 31.3      | 30.3    | 37.0    |
|                           | Distant (%)             | 5.5       | 5.3     | 8.7    | 6.2       | 5.9     | 8.8     |
|                           | Unknown (%)             | 4.0       | 3.6     | 5.0    | 2.8       | 2.6     | 3.4     |
| New York<br>(NPCR)        | No. of patients         | 38,454    | 31,977  | 4698   | 77,190    | 62,615  | 10,619  |
|                           | Localized (%)           | 58.6      | 60.4    | 49.3   | 60.9      | 62.5    | 51.5    |
|                           | Regional (%)            | 28.6      | 27.7    | 35.2   | 30.7      | 29.4    | 37.3    |
|                           | Distant (%)             | 4.8       | 4.6     | 6.9    | 5.5       | 5.1     | 8.1     |
|                           | Unknown (%)             | 7.9       | 7.3     | 8.6    | 3.0       | 2.9     | 3.1     |
| Pennsylvania<br>(NPCR)    | No. of patients         | 27,278    | 24,710  | 2107   | 54,241    | 48,490  | 4670    |
|                           | Localized (%)           | 61.5      | 62.5    | 50.8   | 61.0      | 61.8    | 52.0    |
|                           | Regional (%)            | 29.5      | 28.9    | 36.2   | 30.6      | 30.1    | 36.0    |
|                           | Distant (%)             | 5.4       | 5.3     | 7.7    | 6.5       | 6.2     | 9.5     |
|                           | Unknown (%)             | 3.5       | 3.3     | 5.3    | 1.9       | 1.8     | 2.5     |
| <b>SOUTH</b>              |                         |           |         |        |           |         |         |
| <b>South Atlantic</b>     |                         |           |         |        |           |         |         |
| Delaware<br>(NPCR)        | No. of patients         | 1641      | 1368    | 244    | 3533      | 2832    | 627     |
|                           | Localized (%)           | 64.7      | 65.6    | 60.2   | 63.8      | 64.7    | 60.1    |
|                           | Regional (%)            | 29.2      | 28.7    | 32.0   | 29.8      | 29.1    | 33.0    |
|                           | Distant (%)             | 3.2       | 3.0     | 4.9    | 5.2       | 5.0     | 6.1     |
|                           | Unknown (%)             | 2.9       | 2.8     | 2.9    | 1.2       | 1.2     | 0.8     |
| Florida<br>(NPCR)         | No. of patients         | 37,256    | 33,411  | 3242   | 74,468    | 65,115  | 7545    |
|                           | Localized (%)           | 61.3      | 62.6    | 48.4   | 61.1      | 62.5    | 49.0    |
|                           | Regional (%)            | 29.0      | 28.1    | 38.1   | 30.7      | 29.8    | 38.2    |
|                           | Distant (%)             | 4.5       | 4.2     | 7.5    | 5.2       | 4.8     | 9.0     |
|                           | Unknown (%)             | 5.2       | 5.1     | 6.0    | 3.0       | 2.9     | 3.7     |
| Georgia<br>(NPCR/SEER)    | No. of patients         | 15,028    | 11,425  | 3398   | 32,583    | 23,327  | 8643    |
|                           | Localized (%)           | 59.4      | 62.1    | 50.6   | 60.4      | 63.5    | 52.4    |
|                           | Regional (%)            | 33.6      | 31.8    | 39.4   | 32.4      | 30.2    | 38.1    |
|                           | Distant (%)             | 4.0       | 3.3     | 6.6    | 5.5       | 4.6     | 8.0     |
|                           | Unknown (%)             | 2.9       | 2.8     | 3.3    | 1.7       | 1.7     | 1.5     |

**SUPPORTING TABLE 1.** *Continued*

|                           | SEER Summary<br>Stage 2000 | 2001-2003 |        |       | 2004-2009 |        |       |
|---------------------------|----------------------------|-----------|--------|-------|-----------|--------|-------|
|                           |                            | All Races | White  | Black | All Races | White  | Black |
| Maryland<br>(NPCR)        | No. of patients            | 10,190    | 7597   | 2243  | 20,197    | 14,385 | 4875  |
|                           | Localized (%)              | -         | -      | -     | -         | -      | -     |
|                           | Regional (%)               | -         | -      | -     | -         | -      | -     |
|                           | Distant (%)                | -         | -      | -     | -         | -      | -     |
|                           | Unknown (%)                | -         | -      | -     | -         | -      | -     |
| North Carolina<br>(NPCR)  | No. of patients            | 16,183    | 13,037 | 2895  | 35,870    | 28,268 | 6853  |
|                           | Localized (%)              | 60.5      | 62.9   | 50.0  | 60.5      | 62.6   | 52.2  |
|                           | Regional (%)               | 31.8      | 30.2   | 38.9  | 31.9      | 30.5   | 37.2  |
|                           | Distant (%)                | 5.0       | 4.4    | 7.4   | 5.1       | 4.5    | 7.5   |
|                           | Unknown (%)                | 2.7       | 2.5    | 3.7   | 2.5       | 2.4    | 3.0   |
| South Carolina<br>(NPCR)  | No. of patients            | 8174      | 6210   | 1881  | 17,651    | 13,066 | 4345  |
|                           | Localized (%)              | 61.0      | 64.2   | 50.6  | 60.6      | 63.2   | 52.9  |
|                           | Regional (%)               | 30.4      | 28.3   | 37.1  | 32.8      | 31.1   | 38.2  |
|                           | Distant (%)                | 4.1       | 3.3    | 7.0   | 5.2       | 4.5    | 7.4   |
|                           | Unknown (%)                | 4.5       | 4.2    | 5.3   | 1.4       | 1.3    | 1.5   |
| West Virginia<br>(NPCR)   | No. of patients            | 3764      | 3654   | 93    | 7460      | 7226   | 182   |
|                           | Localized (%)              | 60.3      | 60.8   | 39.8  | 61.2      | 61.5   | 51.6  |
|                           | Regional (%)               | 28.5      | 28.1   | 46.2  | 30.3      | 30.1   | 37.4  |
|                           | Distant (%)                | 5.2       | 5.3    | 5.4   | 5.7       | 5.6    | 7.1   |
|                           | Unknown (%)                | 6.0       | 5.9    | 8.6   | 2.8       | 2.8    | 3.8   |
| <b>East South Central</b> |                            |           |        |       |           |        |       |
| Alabama<br>(NPCR)         | No. of patients            | 8559      | 6725   | 1751  | 18,195    | 13,801 | 4132  |
|                           | Localized (%)              | 60.3      | 63.2   | 50.1  | 56.4      | 58.7   | 48.6  |
|                           | Regional (%)               | 31.9      | 30.0   | 38.6  | 35.4      | 34.2   | 40.3  |
|                           | Distant (%)                | 4.2       | 3.6    | 6.6   | 5.6       | 4.8    | 8.2   |
|                           | Unknown (%)                | 3.6       | 3.2    | 4.7   | 2.5       | 2.3    | 2.9   |
| Kentucky<br>(NPCR/SEER)   | No. of patients            | 8108      | 7532   | 522   | 16,782    | 15,529 | 1091  |
|                           | Localized (%)              | 60.9      | 61.2   | 56.9  | 61.8      | 62.3   | 54.8  |
|                           | Regional (%)               | 30.4      | 30.2   | 33.1  | 30.7      | 30.5   | 34.1  |
|                           | Distant (%)                | 4.2       | 4.1    | 5.2   | 5.5       | 5.3    | 8.5   |
|                           | Unknown (%)                | 4.5       | 4.4    | 4.8   | 2.0       | 1.9    | 2.6   |
| Mississippi<br>(NPCR)     | No. of patients            | 1572      | 1100   | 462   | 10,552    | 7156   | 3316  |
|                           | Localized (%)              | 57.5      | 61.6   | 47.8  | 55.8      | 59.2   | 48.3  |
|                           | Regional (%)               | 33.7      | 30.5   | 41.8  | 35.3      | 33.2   | 39.9  |
|                           | Distant (%)                | 5.0       | 4.1    | 6.9   | 6.7       | 5.4    | 9.3   |
|                           | Unknown (%)                | 3.8       | 3.8    | 3.5   | 2.3       | 2.2    | 2.5   |
| Tennessee<br>(NPCR)       | No. of patients            | 3590      | 3070   | 484   | 24,406    | 20,697 | 3392  |
|                           | Localized (%)              | 59.9      | 61.6   | 49.6  | 58.2      | 60.0   | 48.1  |
|                           | Regional (%)               | 33.0      | 31.8   | 39.9  | 33.1      | 31.9   | 40.2  |
|                           | Distant (%)                | 3.9       | 3.8    | 5.2   | 5.5       | 5.0    | 8.2   |
|                           | Unknown (%)                | 3.2       | 2.8    | 5.4   | 3.3       | 3.1    | 3.5   |
| <b>West South Central</b> |                            |           |        |       |           |        |       |
| Louisiana<br>(NPCR/SEER)  | No. of patients            | 8282      | 5926   | 2311  | 16,279    | 11,499 | 4650  |
|                           | Localized (%)              | 57.9      | 62.0   | 47.6  | 59.0      | 61.9   | 51.8  |
|                           | Regional (%)               | 34.9      | 32.3   | 41.4  | 33.5      | 31.6   | 38.0  |
|                           | Distant (%)                | 5.5       | 4.2    | 8.8   | 6.2       | 5.2    | 8.8   |
|                           | Unknown (%)                | 1.7       | 1.6    | 2.2   | 1.3       | 1.3    | 1.3   |
| Oklahoma<br>(NPCR)        | No. of patients            | 7348      | 6377   | 409   | 14,378    | 12,203 | 859   |
|                           | Localized (%)              | 57.8      | 58.9   | 46.7  | 56.3      | 57.3   | 48.8  |
|                           | Regional (%)               | 28.0      | 27.2   | 37.2  | 31.6      | 31.1   | 37.4  |
|                           | Distant (%)                | 5.9       | 5.8    | 7.8   | 6.1       | 5.8    | 8.7   |
|                           | Unknown (%)                | 8.2       | 8.1    | 8.3   | 6.1       | 5.7    | 5.1   |
| Texas<br>(NPCR)           | No. of patients            | 35,959    | 31,282 | 3686  | 74,903    | 63,984 | 8425  |
|                           | Localized (%)              | 55.5      | 56.5   | 46.6  | 55.9      | 57.1   | 47.6  |
|                           | Regional (%)               | 30.2      | 29.8   | 35.2  | 31.7      | 31.1   | 36.0  |
|                           | Distant (%)                | 4.9       | 4.6    | 8.1   | 6.0       | 5.6    | 9.3   |
|                           | Unknown (%)                | 9.4       | 9.1    | 10.1  | 6.4       | 6.2    | 7.0   |
| <b>MIDWEST</b>            |                            |           |        |       |           |        |       |
| <b>East North Central</b> |                            |           |        |       |           |        |       |
| Michigan<br>(NPCR/SEER)   | No. of patients            | 20,290    | 17,675 | 2245  | 39,181    | 33,076 | 4716  |
|                           | Localized (%)              | 60.7      | 62.1   | 51.3  | 57.2      | 58.8   | 45.8  |
|                           | Regional (%)               | 28.9      | 28.0   | 35.4  | 26.2      | 25.9   | 28.5  |
|                           | Distant (%)                | 4.1       | 3.6    | 8.1   | 4.7       | 4.4    | 7.6   |
|                           | Unknown (%)                | 6.2       | 6.3    | 5.2   | 11.9      | 10.9   | 18.1  |

SUPPORTING TABLE 1. *Continued*

|                           | SEER Summary<br>Stage 2000 | 2001-2003 |        |       | 2004-2009 |         |       |
|---------------------------|----------------------------|-----------|--------|-------|-----------|---------|-------|
|                           |                            | All Races | White  | Black | All Races | White   | Black |
| Ohio<br>(NPCR)            | No. of patients            | 23,345    | 20,755 | 2084  | 46,497    | 40,859  | 4709  |
|                           | Localized (%)              | 60.9      | 61.6   | 54.4  | 60.1      | 60.9    | 53.1  |
|                           | Regional (%)               | 28.3      | 27.7   | 33.1  | 31.3      | 30.8    | 36.2  |
|                           | Distant (%)                | 4.5       | 4.4    | 6.4   | 5.5       | 5.3     | 7.6   |
|                           | Unknown (%)                | 6.3       | 6.3    | 6.1   | 3.1       | 3.0     | 3.1   |
| Wisconsin<br>(NPCR)       | No. of patients            | 11,295    | 10,746 | 380   | 22,106    | 20,921  | 815   |
|                           | Localized (%)              | -         | -      | -     | -         | -       | -     |
|                           | Regional (%)               | -         | -      | -     | -         | -       | -     |
|                           | Distant (%)                | -         | -      | -     | -         | -       | -     |
|                           | Unknown (%)                | -         | -      | -     | -         | -       | -     |
| <b>West North Central</b> |                            |           |        |       |           |         |       |
| Iowa<br>(SEER)            | No. of patients            | 6205      | 6082   | 66    | 12,046    | 11,782  | 151   |
|                           | Localized (%)              | 64.8      | 65.1   | 43.9  | 64.3      | 64.4    | 58.3  |
|                           | Regional (%)               | 29.3      | 29.0   | 48.5  | 29.3      | 29.3    | 31.8  |
|                           | Distant (%)                | 3.9       | 3.8    | 6.1   | 5.0       | 4.9     | 9.3   |
|                           | Unknown (%)                | 2.1       | 2.1    | 1.5   | 1.4       | 1.4     | 0.7   |
| Nebraska<br>(NPCR)        | No. of patients            | 3930      | 3797   | 78    | 7631      | 7308    | 206   |
|                           | Localized (%)              | 60.7      | 60.7   | 65.4  | 61.6      | 62.1    | 48.5  |
|                           | Regional (%)               | 30.8      | 30.9   | 28.2  | 31.8      | 31.6    | 39.8  |
|                           | Distant (%)                | 3.9       | 4.0    | 5.1   | 4.2       | 4.1     | 8.3   |
|                           | Unknown (%)                | 4.6       | 4.4    | 1.3   | 2.3       | 2.2     | 3.4   |
| <b>WEST</b>               |                            |           |        |       |           |         |       |
| <b>Mountain</b>           |                            |           |        |       |           |         |       |
| Colorado<br>(NPCR)        | No. of patients            | 7935      | 7490   | 199   | 16,791    | 15,695  | 477   |
|                           | Localized (%)              | 62.2      | 62.5   | 58.8  | 62.5      | 62.7    | 54.7  |
|                           | Regional (%)               | 30.3      | 30.2   | 35.2  | 31.5      | 31.5    | 38.2  |
|                           | Distant (%)                | 3.5       | 3.6    | 3.0   | 4.4       | 4.3     | 6.3   |
|                           | Unknown (%)                | 4.0       | 3.8    | 3.0   | 1.7       | 1.4     | 0.8   |
| Idaho<br>(NPCR)           | No. of patients            | 2351      | 2312   | -     | 4899      | 4796    | -     |
|                           | Localized (%)              | 60.5      | 60.8   | 0.0   | 61.2      | 61.4    | 42.9  |
|                           | Regional (%)               | 32.7      | 32.5   | 100.0 | 32.1      | 31.9    | 57.1  |
|                           | Distant (%)                | 4.0       | 4.0    | 0.0   | 5.1       | 5.2     | 0.0   |
|                           | Unknown (%)                | 2.8       | 2.8    | 0.0   | 1.6       | 1.5     | 0.0   |
| Montana<br>(NPCR)         | No. of patients            | 1877      | 1767   | -     | 3804      | 3598    | -     |
|                           | Localized (%)              | 63.6      | 64.3   | 33.3  | 63.1      | 63.6    | 66.7  |
|                           | Regional (%)               | 30.0      | 29.5   | 33.3  | 31.1      | 30.7    | 33.3  |
|                           | Distant (%)                | 3.4       | 3.3    | 0.0   | 4.4       | 4.4     | 0.0   |
|                           | Unknown (%)                | 3.0       | 2.8    | 33.3  | 1.4       | 1.3     | 0.0   |
| New Mexico<br>(SEER)      | No. of patients            | 3072      | 2908   | 34    | 6635      | 6169    | 83    |
|                           | Localized (%)              | 60.5      | 60.8   | 61.8  | 63.0      | 63.7    | 56.6  |
|                           | Regional (%)               | 30.7      | 30.5   | 38.2  | 29.6      | 29.3    | 36.1  |
|                           | Distant (%)                | 4.6       | 4.4    | 0.0   | 5.1       | 4.9     | 7.2   |
|                           | Unknown (%)                | 4.2       | 4.3    | 0.0   | 2.3       | 2.1     | 0.0   |
| Utah<br>(SEER)            | No. of patients            | 2954      | 2882   | 16    | 6462      | 6284    | 28    |
|                           | Localized (%)              | 60.7      | 60.8   | 50.0  | 59.0      | 59.1    | 60.7  |
|                           | Regional (%)               | 33.6      | 33.7   | 25.0  | 35.5      | 35.5    | 32.1  |
|                           | Distant (%)                | 4.2       | 4.1    | 12.5  | 4.6       | 4.6     | 7.1   |
|                           | Unknown (%)                | 1.5       | 1.4    | 12.5  | 0.9       | 0.9     | 0.0   |
| Wyoming<br>(NPCR)         | No. of patients            | 927       | 900    | -     | 1841      | 1803    | -     |
|                           | Localized (%)              | 60.4      | 60.6   | 66.7  | 59.4      | 59.3    | 71.4  |
|                           | Regional (%)               | 27.9      | 27.7   | 33.3  | 32.8      | 32.7    | 28.6  |
|                           | Distant (%)                | 4.7       | 4.9    | 0.0   | 5.4       | 5.5     | 0.0   |
|                           | Unknown (%)                | 6.9       | 6.9    | 0.0   | 2.4       | 2.4     | 0.0   |
| <b>Pacific</b>            |                            |           |        |       |           |         |       |
| Alaska<br>(NPCR)          | No. of patients            | 980       | 762    | 21    | 2093      | 1593    | 54    |
|                           | Localized (%)              | 58.8      | 57.7   | 57.1  | 59.1      | 59.3    | 42.6  |
|                           | Regional (%)               | 34.0      | 34.5   | 38.1  | 30.1      | 30.2    | 38.9  |
|                           | Distant (%)                | 3.9       | 4.1    | 0.0   | 5.1       | 5.2     | 13.0  |
|                           | Unknown (%)                | 3.4       | 3.7    | 4.8   | 5.7       | 5.3     | 5.6   |
| California<br>(NPCR/SEER) | No. of patients            | 61,104    | 51,327 | 3592  | 124,572   | 101,282 | 7926  |
|                           | Localized (%)              | 61.3      | 61.9   | 52.3  | 61.9      | 62.4    | 54.4  |
|                           | Regional (%)               | 32.9      | 32.5   | 38.2  | 32.0      | 31.8    | 36.3  |
|                           | Distant (%)                | 4.1       | 4.0    | 6.9   | 4.9       | 4.7     | 8.1   |
|                           | Unknown (%)                | 1.7       | 1.6    | 2.5   | 1.2       | 1.1     | 1.2   |

**SUPPORTING TABLE 1.** *Continued*

|                           | SEER Summary<br>Stage 2000 | 2001-2003 |        |       | 2004-2009 |        |       |
|---------------------------|----------------------------|-----------|--------|-------|-----------|--------|-------|
|                           |                            | All Races | White  | Black | All Races | White  | Black |
| Hawaii<br>(SEER)          | No. of patients            | 2469      | 687    | 12    | 4995      | 1392   | 36    |
|                           | Localized (%)              | 67.9      | 71.2   | 41.7  | 66.5      | 65.8   | 58.3  |
|                           | Regional (%)               | 27.2      | 24.7   | 41.7  | 27.5      | 27.9   | 36.1  |
|                           | Distant (%)                | 3.9       | 3.3    | 16.7  | 4.5       | 4.6    | 5.6   |
|                           | Unknown (%)                | 0.9       | 0.7    | 0.0   | 1.5       | 1.7    | 0.0   |
| Oregon<br>(NPCR)          | No. of patients            | 7881      | 7456   | 82    | 15,867    | 14,886 | 159   |
|                           | Localized (%)              | 66.0      | 66.0   | 53.7  | 64.4      | 64.6   | 49.1  |
|                           | Regional (%)               | 28.0      | 28.0   | 40.2  | 29.3      | 29.2   | 37.7  |
|                           | Distant (%)                | 3.8       | 3.8    | 4.9   | 4.7       | 4.6    | 11.9  |
|                           | Unknown (%)                | 2.2       | 2.3    | 1.2   | 1.7       | 1.7    | 1.3   |
| Washington<br>(NPCR/SEER) | No. of patients            | 12,698    | 11,715 | 220   | 20,130    | 18,176 | 471   |
|                           | Localized (%)              | 63.2      | 63.4   | 52.7  | 63.0      | 63.4   | 52.9  |
|                           | Regional (%)               | 31.7      | 31.5   | 40.5  | 31.4      | 31.2   | 38.2  |
|                           | Distant (%)                | 3.7       | 3.7    | 5.5   | 4.4       | 4.3    | 6.8   |
|                           | Unknown (%)                | 1.4       | 1.4    | 1.4   | 1.1       | 1.1    | 2.1   |

Abbreviations: NPCR indicates National Program of Cancer Registries; SEER indicates Surveillance, Epidemiology, and End Results program.

<sup>a</sup>Information on stage was not available for 2 states (Maryland and Wisconsin) or for Rhode Island for cases diagnosed between 2004 and 2009.

**SUPPORTING TABLE 2.** Breast Cancer: Age-Standardized Net Survival (%) at 1 Year, 3 Years, and 5 Years for Females (Ages 15-99 Years) Diagnosed 2001-2009 by Race, Calendar Period of Diagnosis, and US Census Region and States<sup>a</sup>

|                               | Years | 2001-2003   |           |             |           |              |                   | 2004-2009   |           |             |           |              |                    |
|-------------------------------|-------|-------------|-----------|-------------|-----------|--------------|-------------------|-------------|-----------|-------------|-----------|--------------|--------------------|
|                               |       | All Races   |           | White       |           | Black        |                   | All Races   |           | White       |           | Black        |                    |
|                               |       | NS (%)      | 95% CI    | NS (%)      | 95% CI    | NS (%)       | 95% CI            | NS (%)      | 95% CI    | NS (%)      | 95% CI    | NS (%)       | 95% CI             |
| <b>UNITED STATES</b>          |       |             |           |             |           |              |                   |             |           |             |           |              |                    |
|                               | 1     | <b>96.5</b> | 96.4-96.6 | <b>96.8</b> | 96.7-96.9 | <b>92.6</b>  | 92.2-93.0         | <b>96.7</b> | 96.7-96.8 | <b>97.0</b> | 97.0-97.1 | <b>93.6</b>  | 93.3-93.8          |
|                               | 3     | <b>91.8</b> | 91.6-91.9 | <b>92.5</b> | 92.4-92.7 | <b>83.1</b>  | 82.5-83.7         | <b>92.1</b> | 92.0-92.2 | <b>92.9</b> | 92.7-93.0 | <b>84.3</b>  | 83.9-84.8          |
|                               | 5     | <b>88.2</b> | 88.0-88.3 | <b>89.1</b> | 88.9-89.3 | <b>76.9</b>  | 76.2-77.6         | <b>88.6</b> | 88.4-88.8 | <b>89.6</b> | 89.4-89.8 | <b>78.4</b>  | 77.7-79.1          |
| <b>NORTHEAST</b>              |       |             |           |             |           |              |                   |             |           |             |           |              |                    |
| <b>New England</b>            |       |             |           |             |           |              |                   |             |           |             |           |              |                    |
| <b>Connecticut (SEER)</b>     |       |             |           |             |           |              |                   |             |           |             |           |              |                    |
|                               | 1     | <b>96.8</b> | 96.3-97.4 | <b>96.9</b> | 96.3-97.5 | <b>95.4</b>  | 92.4-98.4         | <b>97.2</b> | 96.8-97.6 | <b>97.3</b> | 96.9-97.8 | <b>93.5</b>  | 91.0-96.0          |
|                               | 3     | <b>93.4</b> | 92.4-94.4 | <b>93.8</b> | 92.8-94.7 | <b>86.9</b>  | 82.0-91.8         | <b>93.1</b> | 92.2-93.9 | <b>93.6</b> | 92.8-94.5 | <b>82.0</b>  | 77.8-86.2          |
|                               | 5     | <b>89.7</b> | 88.4-90.9 | <b>90.3</b> | 88.9-91.6 | <b>77.2</b>  | 70.9-83.4         | <b>90.4</b> | 89.0-91.7 | <b>91.1</b> | 89.8-92.5 | <b>75.6</b>  | 69.0-82.2          |
| <b>Massachusetts (NPCR)</b>   |       |             |           |             |           |              |                   |             |           |             |           |              |                    |
|                               | 1     | <b>97.1</b> | 96.7-97.5 | <b>97.2</b> | 96.7-97.6 | <b>93.1</b>  | 90.0-96.3         | <b>97.7</b> | 97.4-98.0 | <b>97.7</b> | 97.4-98.0 | <b>96.4</b>  | 94.6-98.2          |
|                               | 3     | <b>93.3</b> | 92.6-94.0 | <b>93.3</b> | 92.6-94.0 | <b>87.6</b>  | 82.7-92.5         | <b>94.5</b> | 93.9-95.1 | <b>94.6</b> | 94.0-95.2 | <b>90.8</b>  | 87.5-94.2          |
|                               | 5     | <b>90.1</b> | 89.2-91.1 | <b>90.2</b> | 89.2-91.2 | <b>80.4</b>  | 74.4-86.4         | <b>92.0</b> | 90.9-93.0 | <b>92.1</b> | 91.0-93.2 | <b>81.9</b>  | 74.7-89.1          |
| <b>New Hampshire (NPCR)</b>   |       |             |           |             |           |              |                   |             |           |             |           |              |                    |
|                               | 1     | <b>97.5</b> | 96.5-98.5 | <b>97.4</b> | 96.3-98.4 | <i>100.0</i> | -                 | <b>98.1</b> | 97.5-98.8 | <b>98.3</b> | 97.7-98.9 | <i>100.0</i> | <i>100.0-100.0</i> |
|                               | 3     | <b>92.8</b> | 91.0-94.5 | <b>92.7</b> | 90.9-94.4 | <i>93.1</i>  | <i>76.1-100.0</i> | <b>94.6</b> | 93.3-95.9 | <b>94.8</b> | 93.5-96.1 | <i>85.1</i>  | <i>62.7-100.0</i>  |
|                               | 5     | <b>89.7</b> | 87.4-92.1 | <b>89.9</b> | 87.5-92.2 | <i>87.1</i>  | <i>64.3-100.0</i> | <b>92.4</b> | 90.2-94.6 | <b>92.8</b> | 90.5-95.0 | <i>86.1</i>  | <i>63.4-100.0</i>  |
| <b>Rhode Island (NPCR)</b>    |       |             |           |             |           |              |                   |             |           |             |           |              |                    |
|                               | 1     | <b>97.3</b> | 96.3-98.3 | <b>97.4</b> | 96.4-98.4 | <i>91.8</i>  | <i>84.7-98.9</i>  | <b>97.7</b> | 97.0-98.4 | <b>97.7</b> | 97.0-98.4 | <b>97.4</b>  | 93.4-100.0         |
|                               | 3     | <b>94.1</b> | 92.3-95.8 | <b>94.2</b> | 92.4-95.9 | <i>86.2</i>  | <i>76.8-95.6</i>  | <b>93.5</b> | 92.1-94.9 | <b>93.6</b> | 92.2-95.0 | <b>88.7</b>  | 80.3-97.1          |
|                               | 5     | <b>88.7</b> | 86.3-91.1 | <b>88.7</b> | 86.3-91.2 | <i>81.4</i>  | <i>70.4-92.5</i>  | <b>92.3</b> | 89.8-94.7 | <b>92.6</b> | 90.1-95.1 | <b>75.5</b>  | 61.9-89.1          |
| <b>Mid Atlantic</b>           |       |             |           |             |           |              |                   |             |           |             |           |              |                    |
| <b>New Jersey (NPCR/SEER)</b> |       |             |           |             |           |              |                   |             |           |             |           |              |                    |
|                               | 1     | <b>95.8</b> | 95.4-96.2 | <b>96.1</b> | 95.7-96.6 | <b>91.8</b>  | 90.0-93.6         | <b>96.1</b> | 95.8-96.4 | <b>96.5</b> | 96.1-96.8 | <b>92.8</b>  | 91.5-94.0          |
|                               | 3     | <b>90.5</b> | 89.8-91.1 | <b>91.3</b> | 90.6-92.0 | <b>81.0</b>  | 78.3-83.7         | <b>90.9</b> | 90.4-91.5 | <b>91.9</b> | 91.3-92.5 | <b>82.5</b>  | 80.3-84.7          |
|                               | 5     | <b>86.3</b> | 85.4-87.2 | <b>87.6</b> | 86.7-88.5 | <b>73.1</b>  | 69.8-76.4         | <b>87.0</b> | 86.0-87.9 | <b>88.3</b> | 87.3-89.3 | <b>73.7</b>  | 69.7-77.7          |
| <b>New York (NPCR)</b>        |       |             |           |             |           |              |                   |             |           |             |           |              |                    |
|                               | 1     | <b>96.0</b> | 95.7-96.3 | <b>96.4</b> | 96.1-96.7 | <b>92.8</b>  | 91.7-93.8         | <b>96.7</b> | 96.5-96.9 | <b>96.9</b> | 96.7-97.2 | <b>94.2</b>  | 93.6-94.9          |
|                               | 3     | <b>91.0</b> | 90.5-91.4 | <b>91.9</b> | 91.5-92.4 | <b>82.2</b>  | 80.6-83.8         | <b>92.2</b> | 91.8-92.6 | <b>93.0</b> | 92.7-93.4 | <b>84.7</b>  | 83.5-86.0          |
|                               | 5     | <b>87.5</b> | 86.9-88.1 | <b>88.8</b> | 88.1-89.4 | <b>75.7</b>  | 73.8-77.6         | <b>88.7</b> | 88.1-89.4 | <b>89.8</b> | 89.1-90.5 | <b>79.2</b>  | 77.4-81.0          |
| <b>Pennsylvania (NPCR)</b>    |       |             |           |             |           |              |                   |             |           |             |           |              |                    |
|                               | 1     | <b>96.3</b> | 96.0-96.7 | <b>96.6</b> | 96.3-96.9 | <b>92.6</b>  | 91.0-94.2         | <b>96.4</b> | 96.2-96.7 | <b>96.5</b> | 96.3-96.8 | <b>94.9</b>  | 94.0-95.9          |
|                               | 3     | <b>90.9</b> | 90.4-91.4 | <b>91.5</b> | 91.0-92.1 | <b>83.8</b>  | 81.4-86.3         | <b>91.9</b> | 91.5-92.3 | <b>92.3</b> | 91.8-92.8 | <b>86.6</b>  | 84.8-88.5          |
|                               | 5     | <b>87.1</b> | 86.4-87.8 | <b>87.8</b> | 87.1-88.5 | <b>78.0</b>  | 75.0-81.0         | <b>88.1</b> | 87.4-88.9 | <b>88.7</b> | 88.0-89.5 | <b>80.4</b>  | 77.5-83.4          |



**SUPPORTING TABLE 2.** *Continued*

|                        | Years | 2001-2003   |            |             |            |              |                   | 2004-2009   |           |             |           |              |                    |
|------------------------|-------|-------------|------------|-------------|------------|--------------|-------------------|-------------|-----------|-------------|-----------|--------------|--------------------|
|                        |       | All Races   |            | White       |            | Black        |                   | All Races   |           | White       |           | Black        |                    |
|                        |       | NS (%)      | 95% CI     | NS (%)      | 95% CI     | NS (%)       | 95% CI            | NS (%)      | 95% CI    | NS (%)      | 95% CI    | NS (%)       | 95% CI             |
| Nebraska (NPCR)        | 1     | <b>95.9</b> | 95.1-96.8  | <b>96.0</b> | 95.1-96.8  | <b>90.0</b>  | 83.8-96.2         | <b>97.7</b> | 97.2-98.3 | <b>97.8</b> | 97.2-98.4 | <b>95.9</b>  | 91.7-100.0         |
|                        | 3     | <b>92.0</b> | 90.6-93.4  | <b>92.3</b> | 90.9-93.6  | <b>69.4</b>  | 59.6-79.2         | <b>93.3</b> | 92.1-94.5 | <b>93.5</b> | 92.3-94.7 | <b>89.7</b>  | 81.1-98.3          |
|                        | 5     | <b>88.4</b> | 86.6-90.2  | <b>88.6</b> | 86.8-90.5  | <b>68.4</b>  | 58.0-78.7         | <b>91.8</b> | 89.7-93.8 | <b>92.0</b> | 89.9-94.1 | <b>87.1</b>  | 74.4-99.8          |
| <b>WEST</b>            |       |             |            |             |            |              |                   |             |           |             |           |              |                    |
| <b>Mountain</b>        |       |             |            |             |            |              |                   |             |           |             |           |              |                    |
| Colorado (NPCR)        | 1     | <b>97.3</b> | 96.7-98.0  | <b>97.2</b> | 96.6-97.9  | <b>96.7</b>  | 92.3-100.0        | <b>97.9</b> | 97.5-98.3 | <b>97.9</b> | 97.4-98.3 | <b>96.3</b>  | 93.3-99.3          |
|                        | 3     | <b>93.2</b> | 92.1-94.2  | <b>93.1</b> | 92.0-94.1  | <b>86.0</b>  | 78.2-93.8         | <b>94.6</b> | 93.7-95.4 | <b>94.6</b> | 93.7-95.4 | <b>87.3</b>  | 81.6-93.0          |
|                        | 5     | <b>91.2</b> | 89.8-92.6  | <b>90.9</b> | 89.5-92.3  | <b>80.9</b>  | 72.1-89.7         | <b>91.1</b> | 89.5-92.6 | <b>91.0</b> | 89.4-92.6 | <b>86.2</b>  | 78.0-94.4          |
| Idaho (NPCR)           | 1     | <b>97.5</b> | 96.5-98.6  | <b>97.5</b> | 96.5-98.5  |              | -                 | <b>97.3</b> | 96.5-98.0 | <b>97.2</b> | 96.4-98.0 |              | -                  |
|                        | 3     | <b>95.1</b> | 93.5-96.8  | <b>95.3</b> | 93.6-97.0  |              | -                 | <b>92.5</b> | 90.9-94.0 | <b>92.5</b> | 90.9-94.0 |              | -                  |
|                        | 5     | <b>91.7</b> | 89.4-94.1  | <b>91.7</b> | 89.3-94.1  |              | -                 | <b>90.2</b> | 87.6-92.7 | <b>90.3</b> | 87.7-92.8 |              | -                  |
| Montana (NPCR)         | 1     | <b>97.8</b> | 96.7-98.9  | <b>97.8</b> | 96.7-98.9  |              | -                 | <b>97.2</b> | 96.3-98.0 | <b>97.1</b> | 96.3-98.0 |              | -                  |
|                        | 3     | <b>93.7</b> | 91.7-95.7  | <b>94.0</b> | 92.0-96.0  |              | -                 | <b>93.5</b> | 91.8-95.2 | <b>93.6</b> | 91.8-95.3 |              | -                  |
|                        | 5     | <b>91.1</b> | 88.3-93.9  | <b>91.7</b> | 88.8-94.5  |              | -                 | <b>89.6</b> | 86.2-92.9 | <b>89.7</b> | 86.3-93.1 |              | -                  |
| New Mexico (SEER)      | 1     | <b>97.1</b> | 96.2-98.1  | <b>97.3</b> | 96.3-98.2  | <i>92.3</i>  | <i>82.8-100.0</i> | <b>96.5</b> | 95.7-97.2 | <b>96.6</b> | 95.9-97.3 | <b>97.6</b>  | 92.1-100.0         |
|                        | 3     | <b>92.7</b> | 91.1-94.2  | <b>92.8</b> | 91.2-94.4  | <i>73.2</i>  | <i>57.1-89.4</i>  | <b>91.2</b> | 89.8-92.6 | <b>91.6</b> | 90.2-93.0 | <b>86.1</b>  | 72.9-99.4          |
|                        | 5     | <b>88.3</b> | 86.1-90.5  | <b>88.8</b> | 86.6-91.0  | <i>65.3</i>  | <i>47.8-82.8</i>  | <b>85.4</b> | 82.8-88.0 | <b>85.7</b> | 83.0-88.3 | <b>81.3</b>  | 64.6-98.0          |
| Utah (SEER)            | 1     | <b>95.7</b> | 94.6-96.8  | <b>95.7</b> | 94.7-96.8  | <i>89.3</i>  | <i>73.3-100.0</i> | <b>96.4</b> | 95.7-97.2 | <b>96.5</b> | 95.8-97.2 | <i>100.0</i> | <i>100.0-100.0</i> |
|                        | 3     | <b>90.4</b> | 88.6-92.1  | <b>90.5</b> | 88.8-92.2  | <i>84.3</i>  | <i>65.4-100.0</i> | <b>90.8</b> | 89.4-92.2 | <b>90.9</b> | 89.5-92.3 | <i>80.4</i>  | <i>57.6-100.0</i>  |
|                        | 5     | <b>88.0</b> | 85.8-90.2  | <b>87.9</b> | 85.7-90.1  | <i>100.0</i> | <i>75.7-100.0</i> | <b>86.3</b> | 83.8-88.8 | <b>86.4</b> | 83.9-88.9 | <i>81.3</i>  | <i>58.2-100.0</i>  |
| Wyoming (NPCR)         | 1     | <b>97.0</b> | 95.2-98.7  | <b>97.1</b> | 95.3-98.8  |              | -                 | <b>96.4</b> | 95.1-97.7 | <b>96.6</b> | 95.3-97.9 |              | -                  |
|                        | 3     | <b>91.3</b> | 88.2-94.5  | <b>91.2</b> | 88.0-94.4  |              | -                 | <b>92.0</b> | 89.6-94.5 | <b>92.2</b> | 89.8-94.7 |              | -                  |
|                        | 5     | <b>87.2</b> | 83.0-91.4  | <b>87.2</b> | 82.9-91.4  |              | -                 | <b>87.5</b> | 83.1-92.0 | <b>87.7</b> | 83.2-92.2 |              | -                  |
| <b>Pacific</b>         |       |             |            |             |            |              |                   |             |           |             |           |              |                    |
| Alaska (NPCR)          | 1     | <b>98.2</b> | 96.5-100.0 | <b>98.2</b> | 96.3-100.0 | <i>96.4</i>  | <i>87.4-100.0</i> | <b>97.2</b> | 95.9-98.6 | <b>97.0</b> | 95.4-98.6 | <i>95.4</i>  | <i>88.6-100.0</i>  |
|                        | 3     | <b>94.4</b> | 91.1-97.7  | <b>94.6</b> | 90.8-98.3  | <i>82.2</i>  | <i>65.1-99.4</i>  | <b>91.8</b> | 89.1-94.4 | <b>92.3</b> | 89.4-95.2 | <i>91.8</i>  | <i>81.7-100.0</i>  |
|                        | 5     | <b>88.7</b> | 84.1-93.2  | <b>88.5</b> | 83.4-93.7  | <i>79.3</i>  | <i>60.6-98.1</i>  | <b>89.3</b> | 85.2-93.3 | <b>90.0</b> | 85.4-94.5 | <i>83.4</i>  | <i>68.0-98.8</i>   |
| California (NPCR/SEER) | 1     | <b>97.4</b> | 97.2-97.6  | <b>97.5</b> | 97.3-97.7  | <b>93.8</b>  | 92.6-95.0         | <b>97.4</b> | 97.2-97.5 | <b>97.6</b> | 97.4-97.7 | <b>93.7</b>  | 92.9-94.5          |
|                        | 3     | <b>92.9</b> | 92.6-93.3  | <b>93.2</b> | 92.9-93.6  | <b>85.1</b>  | 83.2-87.0         | <b>93.1</b> | 92.8-93.4 | <b>93.4</b> | 93.1-93.8 | <b>85.6</b>  | 84.1-87.1          |
|                        | 5     | <b>89.6</b> | 89.1-90.0  | <b>90.0</b> | 89.6-90.5  | <b>78.5</b>  | 76.2-80.9         | <b>89.7</b> | 89.1-90.2 | <b>90.0</b> | 89.4-90.6 | <b>80.1</b>  | 77.7-82.4          |
| Hawaii (SEER)          | 1     | <b>97.9</b> | 97.0-98.8  | <b>98.9</b> | 97.5-100.0 | <i>75.8</i>  | <i>52.2-99.3</i>  | <b>97.5</b> | 96.8-98.3 | <b>96.7</b> | 95.1-98.2 | <i>94.9</i>  | <i>87.3-100.0</i>  |
|                        | 3     | <b>93.1</b> | 91.4-94.8  | <b>93.1</b> | 89.8-96.4  | <i>75.8</i>  | <i>52.2-99.3</i>  | <b>93.8</b> | 92.4-95.2 | <b>93.2</b> | 90.4-96.1 | <i>83.6</i>  | <i>67.7-99.5</i>   |
|                        | 5     | <b>90.0</b> | 87.8-92.3  | <b>88.9</b> | 84.4-93.4  | <i>75.8</i>  | <i>52.2-99.3</i>  | <b>89.4</b> | 86.5-92.2 | <b>89.0</b> | 83.6-94.3 | <i>53.8</i>  | <i>20.2-87.4</i>   |
| Oregon (NPCR)          | 1     | <b>97.8</b> | 97.2-98.3  | <b>97.8</b> | 97.3-98.3  | <b>92.7</b>  | 85.8-99.5         | <b>97.4</b> | 97.0-97.8 | <b>97.4</b> | 97.0-97.9 | <b>92.8</b>  | 86.7-99.0          |
|                        | 3     | <b>94.6</b> | 93.6-95.5  | <b>94.5</b> | 93.5-95.4  | <b>85.9</b>  | 75.0-96.7         | <b>93.2</b> | 92.4-94.0 | <b>93.1</b> | 92.3-93.9 | <b>77.0</b>  | 64.8-89.2          |
|                        | 5     | <b>91.8</b> | 90.5-93.0  | <b>91.6</b> | 90.3-92.9  | <b>83.0</b>  | 71.1-94.9         | <b>90.5</b> | 89.0-91.9 | <b>90.2</b> | 88.7-91.6 | <b>68.1</b>  | 53.8-82.4          |
| Washington (NPCR)      | 1     | <b>97.8</b> | 97.4-98.3  | <b>97.9</b> | 97.5-98.3  | <b>93.0</b>  | 87.9-98.2         | <b>98.1</b> | 97.8-98.5 | <b>98.2</b> | 97.8-98.5 | <b>92.8</b>  | 89.0-96.5          |
|                        | 3     | <b>94.6</b> | 93.9-95.4  | <b>94.8</b> | 94.1-95.6  | <b>77.1</b>  | 68.4-85.7         | <b>94.7</b> | 94.0-95.4 | <b>94.8</b> | 94.1-95.5 | <b>82.6</b>  | 76.5-88.7          |
|                        | 5     | <b>91.6</b> | 90.6-92.7  | <b>91.7</b> | 90.6-92.7  | <b>73.3</b>  | 64.1-82.4         | <b>92.0</b> | 90.8-93.2 | <b>92.1</b> | 90.9-93.4 | <b>74.1</b>  | 64.2-84.0          |

Abbreviations: CI, confidence interval; NPCR, National Program of Cancer Registries; NS, net survival; SEER, Surveillance, Epidemiology, and End Results program.

<sup>a</sup>Unstandardized estimates are italicized.

**SUPPORTING TABLE 3.** Breast Cancer: 5-Year Age-Standardized Net Survival (%) for Females (Ages 15-99 Years) Diagnosed 2001-2009 by SEER Summary Stage 2000 at Diagnosis, Race, Calendar Period of Diagnosis, and US Census Region and States<sup>a</sup>

|                      | SEER Summary Stage 2000 | 2001-2003   |           |             |           |             |           | 2004-2009   |           |             |           |             |           |
|----------------------|-------------------------|-------------|-----------|-------------|-----------|-------------|-----------|-------------|-----------|-------------|-----------|-------------|-----------|
|                      |                         | All Races   |           | White       |           | Black       |           | All Races   |           | White       |           | Black       |           |
|                      |                         | NS (%)      | 95% CI    |
| <b>UNITED STATES</b> |                         |             |           |             |           |             |           |             |           |             |           |             |           |
| All stages           |                         | <b>88.2</b> | 88.0-88.3 | <b>89.1</b> | 88.9-89.3 | <b>76.9</b> | 76.2-77.6 | <b>88.6</b> | 88.4-88.8 | <b>89.6</b> | 89.4-89.8 | <b>78.4</b> | 77.7-79.1 |
| Localized            |                         | <b>98.0</b> | 97.8-98.2 | <b>98.2</b> | 98.0-98.4 | <b>92.8</b> | 91.9-93.7 | <b>98.3</b> | 98.1-98.6 | <b>98.6</b> | 98.3-98.8 | <b>94.3</b> | 93.4-95.2 |
| Regional             |                         | <b>81.2</b> | 80.8-81.6 | <b>82.3</b> | 82.0-82.7 | <b>69.9</b> | 68.5-71.2 | <b>82.3</b> | 81.9-82.7 | <b>83.5</b> | 83.0-83.9 | <b>71.8</b> | 70.4-73.2 |









**SUPPORTING TABLE 3.** *Continued*

|                           | SEER<br>Summary<br>Stage 2000 | 2001-2003   |            |             |            |             |            | 2004-2009   |            |             |            |             |            |
|---------------------------|-------------------------------|-------------|------------|-------------|------------|-------------|------------|-------------|------------|-------------|------------|-------------|------------|
|                           |                               | All Races   |            | White       |            | Black       |            | All Races   |            | White       |            | Black       |            |
|                           |                               | NS<br>(%)   | 95%<br>CI  |
| California<br>(NPCR/SEER) | All stages                    | <b>89.6</b> | 89.1-90.0  | <b>90.0</b> | 89.6-90.5  | <b>78.5</b> | 76.2-80.9  | <b>89.7</b> | 89.1-90.2  | <b>90.0</b> | 89.4-90.6  | <b>80.1</b> | 77.7-82.4  |
|                           | Localized                     | <b>98.2</b> | 97.7-98.8  | <b>98.4</b> | 97.8-98.9  | <b>93.7</b> | 90.9-96.5  | <b>98.4</b> | 97.8-99.0  | <b>98.5</b> | 97.9-99.1  | <b>94.2</b> | 91.3-97.2  |
|                           | Regional                      | <b>82.4</b> | 81.5-83.4  | <b>82.9</b> | 81.9-83.9  | <b>70.9</b> | 66.7-75.1  | <b>82.4</b> | 81.3-83.5  | <b>82.6</b> | 81.4-83.8  | <b>71.9</b> | 67.6-76.1  |
|                           | Distant                       | <b>22.6</b> | 20.7-24.4  | <b>23.6</b> | 21.6-25.7  | <b>14.7</b> | 9.6-19.8   | <b>26.6</b> | 24.5-28.7  | <b>27.4</b> | 25.0-29.7  | <b>15.6</b> | 11.1-20.1  |
|                           | Unknown                       | <b>52.1</b> | 48.3-56.0  | <b>54.8</b> | 50.5-59.1  | <b>38.8</b> | 27.0-50.5  | <b>46.7</b> | 42.0-51.4  | <b>44.3</b> | 39.1-49.5  | <b>47.5</b> | 31.1-63.9  |
| Hawaii<br>(SEER)          | All stages                    | <b>90.0</b> | 87.8-92.3  | <b>88.9</b> | 84.4-93.4  | 75.8        | 52.2-99.3  | <b>89.4</b> | 86.5-92.2  | <b>89.0</b> | 83.6-94.3  | 53.8        | 20.2-87.4  |
|                           | Localized                     | <b>97.1</b> | 94.8-99.4  | <b>94.7</b> | 90.1-99.3  |             | -          | <b>98.8</b> | 95.6-100.0 | <b>98.5</b> | 92.4-100.0 | 72.2        | 31.7-100.0 |
|                           | Regional                      | <b>83.6</b> | 78.2-89.0  | <b>87.8</b> | 74.6-100.0 |             | -          | <b>76.9</b> | 71.2-82.5  | <b>77.6</b> | 66.9-88.3  | 0.0         | 0.0-0.0    |
|                           | Distant                       | <b>11.9</b> | 5.8-17.9   | 4.7         | 0.0-12.2   |             | -          | <b>19.1</b> | 12.0-26.2  | <b>26.4</b> | 16.7-36.0  |             | -          |
| Oregon<br>(NPCR)          | All stages                    | <b>91.8</b> | 90.5-93.0  | <b>91.6</b> | 90.3-92.9  | <b>83.0</b> | 71.1-94.9  | <b>90.5</b> | 89.0-91.9  | <b>90.2</b> | 88.7-91.6  | <b>68.1</b> | 53.8-82.4  |
|                           | Localized                     | <b>99.2</b> | 97.8-100.0 | <b>99.0</b> | 97.7-100.0 | 99.2        | 89.2-100.0 | <b>98.4</b> | 96.7-100.0 | <b>97.9</b> | 96.2-99.6  | <b>93.5</b> | 77.8-100.0 |
|                           | Regional                      | <b>85.2</b> | 82.4-87.9  | <b>84.9</b> | 82.1-87.8  | 81.1        | 65.9-96.4  | <b>86.6</b> | 83.6-89.6  | <b>86.6</b> | 83.6-89.6  | 58.7        | 37.4-80.0  |
|                           | Distant                       | <b>27.6</b> | 21.8-33.4  | <b>27.7</b> | 21.8-33.6  |             | -          | <b>23.8</b> | 18.5-29.0  | <b>24.2</b> | 18.9-29.5  | 0.2         | 0.0-0.7    |
|                           | Unknown                       | <b>48.6</b> | 39.8-57.4  | <b>48.2</b> | 39.2-57.2  |             | -          | <b>35.5</b> | 27.6-43.4  | <b>34.7</b> | 26.5-42.8  |             | -          |
| Washington<br>(NPCR)      | All stages                    | <b>91.6</b> | 90.6-92.7  | <b>91.7</b> | 90.6-92.7  | <b>73.3</b> | 64.1-82.4  | <b>92.0</b> | 90.8-93.2  | <b>92.1</b> | 90.9-93.4  | <b>74.1</b> | 64.2-84.0  |
|                           | Localized                     | <b>98.4</b> | 97.3-99.6  | <b>98.4</b> | 97.3-99.6  | <b>87.9</b> | 76.0-99.8  | <b>99.2</b> | 97.9-100.0 | <b>99.2</b> | 97.8-100.0 | <b>82.7</b> | 67.1-98.3  |
|                           | Regional                      | <b>85.5</b> | 83.4-87.5  | <b>85.9</b> | 83.8-88.0  | <b>64.0</b> | 51.7-76.2  | <b>84.5</b> | 82.1-86.9  | <b>84.7</b> | 82.2-87.2  | <b>72.8</b> | 60.4-85.2  |
|                           | Distant                       | <b>21.0</b> | 17.1-25.0  | <b>21.3</b> | 17.2-25.4  | 33.9        | 8.5-59.2   | <b>28.7</b> | 23.9-33.5  | <b>27.7</b> | 22.6-32.8  | 28.5        | 7.0-50.1   |
|                           | Unknown                       | <b>53.4</b> | 44.1-62.8  | <b>51.1</b> | 41.6-60.6  |             | -          | <b>42.8</b> | 33.2-52.4  | <b>37.4</b> | 27.5-47.3  | 41.2        | 6.8-75.5   |

Abbreviations: CI, confidence interval; NPCR, National Program of Cancer Registries; NS, net survival; SEER, Surveillance, Epidemiology, and End Results Program.

<sup>a</sup> Information on stage was not available for 2 states (Maryland and Wisconsin) or for Rhode Island for cases diagnosed between 2004 and 2009. Unstandardized estimates are italicized.
